# Supplementary material for: Role of Serum Cholesterol and Statin Use in the Risk of Prostate Cancer Detection and Tumor Aggressiveness
Source: MDPI journal article supplement (doi:10.3390/ijms150813615), 2014-08-06
Supplement: s1 [file s1]

## Role of Metabolic Genes in Blood Arsenic Concentrations of Jamaican Children with and without Autism Spectrum Disorder

---

### Detailed description of General Linear Models used to obtain the results reported in Table 3 (based on 100 matched pairs)

General Linear Models that assessed unadjusted effects of various exposure variables in blood arsenic concentrations of children with and without ASD can be represented by the following linear regression equations:

**Models:**  $E(Y_i | X_{1i}, X_{2i}, X_{12ij}) = \beta_0 + \beta_1 X_{1i} + \beta_{2k} X_{2ki} + \sum_{j=1}^{99} \beta_{3j} X_{3ij}$ ;  $k=1, 2, \dots, 27$  that represent various exposure variables

$i = 1, 2, \dots, 200$  (number of children);  $j = 1, 2, \dots, 99$  (number of dummy variables representing the 100 matched pairs);

$Y_i = \ln$  of blood arsenic concentrations of the  $i^{\text{th}}$  child;

$X_{1i}$  = case status of the  $i^{\text{th}}$  child (ASD case = 1; TD control = 0);

$X_{21i}$  = car ownership associated with family of the  $i^{\text{th}}$  child (No cars = 0; otherwise = 1);

$X_{22i}$  = maternal age at child's birth associated with the  $i^{\text{th}}$  child ("maternal age  $\geq 35$  years" = 1; otherwise = 0);

$X_{23i}$  = parental levels of education associated with the  $i^{\text{th}}$  child (both parents had up to high school = 0; otherwise = 1);

$X_{24i}$  = source of drinking water associated with the  $i^{\text{th}}$  child (piped water = 1; otherwise = 0);

$X_{25i}$  = consumption of "yam, sweet potato, or dasheen" associated with the  $i^{\text{th}}$  child (No consumption = 0; otherwise = 1);

$X_{26i}$  = consumption of "carrot or pumpkin" associated with the  $i^{\text{th}}$  child (No consumption = 0; otherwise = 1);

$X_{27i}$  = consumption of "lettuce" associated with the  $i^{\text{th}}$  child (No consumption = 0; otherwise = 1);

$X_{28i}$  = consumption of "callaloo, broccoli, or pak choi" associated with the  $i^{\text{th}}$  child (No consumption = 0; otherwise = 1);

$X_{29i}$  = consumption of "cabbage" associated with the  $i^{\text{th}}$  child (No consumption = 0; otherwise = 1);

$X_{210i}$  = consumption of "string beans" associated with the  $i^{\text{th}}$  child (No consumption = 0; otherwise = 1);

$X_{211i}$  = consumption of "tomatoes" associated with the  $i^{\text{th}}$  child (No consumption = 0; otherwise = 1);

$X_{212i}$  = consumption of "ackee" associated with the  $i^{\text{th}}$  child (No consumption = 0; otherwise = 1);

$X_{213i}$  = consumption of "avocado" associated with the  $i^{\text{th}}$  child (No consumption = 0; otherwise = 1);

$X_{214i}$  = high seafood consumption associated with the  $i^{\text{th}}$  child (more than 6 seafood meals per week = 1; otherwise = 0);

$X_{215i}$  = frequency of seafood consumption associated with the  $i^{\text{th}}$  child = number of seafood meals consumed in a week;

$X_{216i}$  = consumption of "salt water fish" associated with the  $i^{\text{th}}$  child (No consumption = 0; otherwise = 1);

$X_{217i}$  = consumption of "fresh water fish" associated with the  $i^{\text{th}}$  child (No consumption = 0; otherwise = 1);

$X_{218i}$  = consumption of "sardine, mackerel" associated with the  $i^{\text{th}}$  child (No consumption = 0; otherwise = 1);

$X_{219i}$  = consumption of "tuna" associated with the  $i^{\text{th}}$  child (No consumption = 0; otherwise = 1);

$X_{220i}$  = consumption of "salted fish" associated with the  $i^{\text{th}}$  child (No consumption = 0; otherwise = 1);

$X_{221i}$  = consumption of "shellfish" associated with the  $i^{\text{th}}$  child (No consumption = 0; otherwise = 1);

$X_{222i}$  = consumption of "shrimp" associated with the  $i^{\text{th}}$  child (No consumption = 0; otherwise = 1);

$X_{223i}$  = GSTM1 genotype associated with the  $i^{\text{th}}$  child ("DD" = 0; "I/I" or "I/D" = 1);

$X_{224i}$  = GSTT1 genotype associated with the  $i^{\text{th}}$  child ("DD" = 0; "I/I" or "I/D" = 1);

$X_{225i}$  = "GSTP1(Ile/Ile) genotype" associated with the  $i^{\text{th}}$  child (GSTP1(Ile/Ile) genotype = 1; otherwise = 0);

$X_{226i}$  = "GSTP1(Val/Val) genotype" associated with the  $i^{\text{th}}$  child (GSTP1(Val/Val) genotype = 1; otherwise = 0);

$X_{227i}$  = "GSTP1(Ile/Val) genotype" associated with the  $i^{\text{th}}$  child (GSTP1(Ile/Val) genotype = 1; otherwise = 0);

$$X_{3ij} = \begin{cases} 1, & \text{if the } i^{\text{th}} \text{ child in the } j^{\text{th}} \text{ matched pair is an ASD case} \\ 0, & \text{if the } i^{\text{th}} \text{ child in the } j^{\text{th}} \text{ matched pair is a TD control} \end{cases};$$

$E(Y_i | X_{1i}, X_{2ki}, \dots, X_{3ij})$  stands for mean ln blood arsenic concentrations given the  $X_{1i}, X_{2ki}, X_{3ij}$ ,

$\beta_0, \beta_1, \beta_{2k}, \beta_{3j}$  are regression coefficients associated with the General Linear Models.

**Detailed description of additive General Linear Models that are used to obtain the results reported in Table 4 (based on 65 matched pairs)**

The univariable and final multivariable additive General Linear Models used that assessed possible association between blood arsenic concentrations and ASD status can be represented by the following linear regression equations:

**For the univariable model:**  $E(Y_i | X_{1i}, X_{12ij}) = \beta_{10} + \beta_{11} X_{1i} + \sum_{j=1}^{64} \beta_{112j} X_{12ij}$ ;

**For the final multivariable model:**  $E(Y_i | X_{1i}, X_{2i}, \dots, X_{11i}, X_{12ij}) = \beta_{20} + \beta_{21} X_{1i} + \beta_{22} X_{2i} + \dots + \beta_{211} X_{11i} + \sum_{j=1}^{64} \beta_{212j} X_{12ij}$ ;

$i = 1, 2, \dots, 130$  (number of children);  $j = 1, 2, \dots, 64$  (number of dummy variables representing the 65 matched pairs);

$Y_i = \ln$  of blood arsenic concentrations of the  $i^{\text{th}}$  child;

$X_{1i}$  = case status of the  $i^{\text{th}}$  child (ASD case = 1; TD control = 0);

$X_{2i}$  = car ownership associated with family of the  $i^{\text{th}}$  child (No cars = 0; otherwise = 1);

$X_{3i}$  = maternal age at child's birth associated with the  $i^{\text{th}}$  child ("maternal age  $\geq 35$  years" = 1; otherwise = 0);

$X_{4i}$  = Parental levels of education associated with the  $i^{\text{th}}$  child (both parents had up to high school = 0; otherwise = 1);

$X_{5i}$  = source of drinking water associated with the  $i^{\text{th}}$  child (piped water = 1, otherwise = 0);

$X_{6i}$  = consumption of "yam, sweet potato, or dasheen" associated with the  $i^{\text{th}}$  child (No consumption = 0; otherwise = 1);

$X_{7i}$  = consumption of "carrot or pumpkin" associated with the  $i^{\text{th}}$  child (No consumption = 0; otherwise = 1);

$X_{8i}$  = consumption of "callaloo, broccoli, or pak choi" associated with the  $i^{\text{th}}$  child (No consumption = 0; otherwise = 1);

$X_{9i}$  = consumption of "cabbage" associated with the  $i^{\text{th}}$  child (No consumption = 0; otherwise = 1);

$X_{10i}$  = consumption of "avocado" associated with the  $i^{\text{th}}$  child (No consumption = 0; otherwise = 1);

$X_{11i}$  = frequency of seafood consumption associated with the  $i^{\text{th}}$  child = number of seafood meals consumed in a week;

$X_{12ij} = \begin{cases} 1, & \text{if the } i^{\text{th}} \text{ child in the } j^{\text{th}} \text{ matched pair is an ASD case} \\ 0, & \text{if the } i^{\text{th}} \text{ child in the } j^{\text{th}} \text{ matched pair is a TD control} \end{cases}$ ;

$E(Y_{1i} | X_{1i}, X_{12ij})$  stands for mean  $\ln$  blood arsenic concentrations given  $X_{1i}, X_{12ij}$ ;

$E(Y_{2i} | X_{1i}, X_{2i}, \dots, X_{11i}, X_{12ij})$  stands for mean  $\ln$  blood arsenic concentrations given  $X_{1i}, X_{2i}, \dots, X_{11i}, X_{12ij}$ ;

$\beta_{10}, \beta_{11}, \beta_{112j}$  are regression coefficients associated with the univariable model;

$\beta_{20}, \beta_{21}, \dots, \beta_{211}, \beta_{212j}$  are regression coefficients associated with the final multivariable model.

**Detailed description of additive General Linear Models used to obtain the results reported in Table 4 (based on 100 matched pairs)**

The univariable and final multivariable additive General Linear Models used that assessed possible association between blood arsenic concentrations and ASD status can be represented by the following linear regression equations:

**For the univariable model:**  $E(Y_i | X_{1i}, X_{12ij}) = \beta_{10} + \beta_{11} X_{1i} + \sum_{j=1}^{99} \beta_{112j} X_{12ij}$ ;

**For the final multivariable model:**  $E(Y_i | X_{1i}, X_{2i}, \dots, X_{11i}, X_{12ij}) = \beta_{20} + \beta_{21} X_{1i} + \beta_{22} X_{2i} + \dots + \beta_{211} X_{11i} + \sum_{j=1}^{99} \beta_{212j} X_{12ij}$ ;

$i = 1, 2, \dots, 200$  (number of children);  $j = 1, 2, \dots, 99$  (number of dummy variables representing the 100 matched pairs);

$Y_i = \ln$  of blood arsenic concentrations of the  $i^{\text{th}}$  child;

$X_{1i} =$  case status of the  $i^{\text{th}}$  child (ASD case = 1; TD control = 0);

$X_{2i} =$  car ownership associated with family of the  $i^{\text{th}}$  child (No cars = 0; otherwise = 1);

$X_{3i} =$  maternal age at child's birth associated with the  $i^{\text{th}}$  child ("maternal age  $\geq 35$  years" = 1; otherwise = 0);

$X_{4i} =$  Parental levels of education associated with the  $i^{\text{th}}$  child (both parents had up to high school = 0; otherwise = 1);

$X_{5i} =$  source of drinking water associated with the  $i^{\text{th}}$  child (piped water = 1, otherwise = 0);

$X_{6i} =$  consumption of "yam, sweet potato, or dasheen" associated with the  $i^{\text{th}}$  child (No consumption = 0; otherwise = 1);

$X_{7i} =$  consumption of "carrot or pumpkin" associated with the  $i^{\text{th}}$  child (No consumption = 0; otherwise = 1);

$X_{8i} =$  consumption of "callaloo, broccoli, or pak choi" associated with the  $i^{\text{th}}$  child (No consumption = 0; otherwise = 1);

$X_{9i} =$  consumption of "cabbage" associated with the  $i^{\text{th}}$  child (No consumption = 0; otherwise = 1);

$X_{10i} =$  consumption of "avocado" associated with the  $i^{\text{th}}$  child (No consumption = 0; otherwise = 1);

$X_{11i} =$  frequency of seafood consumption associated with the  $i^{\text{th}}$  child = number of seafood meals consumed in a week;

$X_{12ij} = \begin{cases} 1, & \text{if the } i^{\text{th}} \text{ child in the } j^{\text{th}} \text{ matched pair is an ASD case} \\ 0, & \text{if the } i^{\text{th}} \text{ child in the } j^{\text{th}} \text{ matched pair is a TD control} \end{cases}$ ;

$E(Y_{1i} | X_{1i}, X_{12ij})$  stands for mean  $\ln$  of blood arsenic concentrations given  $X_{1i}, X_{12ij}$ ;

$E(Y_{2i} | X_{1i}, X_{2i}, \dots, X_{12ij})$  stands for mean  $\ln$  of blood arsenic concentrations given  $X_{1i}, X_{2i}, \dots, X_{11i}, X_{12ij}$ ;

$\beta_{10}, \beta_{11}, \beta_{112j}$  are regression coefficients associated with the univariable model;

$\beta_{20}, \beta_{21}, \dots, \beta_{211}, \beta_{212j}$  are regression coefficients associated with the final multivariable model.

**Detailed description of General Linear Models used to obtain the results reported in Table 5 (based on 100 matched pairs)**

General Linear Models that assessed unadjusted and adjusted effects of *GSTP1* in blood arsenic concentrations of children with and without ASD can be represented by the following linear regression equations:

**For the unadjusted model:**  $E(Y_i | X_{1i}, X_{2i}, X_{12ij}) = \beta_{10} + \beta_{11} X_{1i} + \beta_{12} X_{2i} + \beta_{13} X_{1i} * X_{2i} + \sum_{j=1}^{99} \beta_{113j} X_{13ij}$ ;

**For the final adjusted model:**  $E(Y_i | X_{1i}, X_{2i}, \dots, X_{11i}, X_{12ij}) = \beta_{20} + \beta_{21} X_{1i} + \beta_{22} X_{2i} + \dots + \beta_{212} X_{12i} + \beta_{13} X_{1i} * X_{2i} + \sum_{j=1}^{99} \beta_{213j} X_{13ij}$ ;

$i = 1, 2, \dots, 200$  (number of children);  $j = 1, 2, \dots, 99$  (number of dummy variables representing the 99 matched pairs);

$Y_i = \ln$  of blood arsenic concentrations of the  $i^{th}$  child;

$X_{1i} =$  case status of the  $i^{th}$  child (ASD case = 1; TD control = 0);

$X_{2i} =$  GSTP1 genotype associated with the  $i^{th}$  child (GSTP1 is categorized into 2 levels);

$X_{3i} =$  car ownership associated with family of the  $i^{th}$  child (No cars = 0; otherwise = 1);

$X_{4i} =$  maternal age at child's birth associated with the  $i^{th}$  child ("maternal age  $\geq 35$  years" = 1; otherwise = 0);

$X_{5i} =$  Parental levels of education associated with the  $i^{th}$  child (both parent up to high school = 0; otherwise = 1);

$X_{6i} =$  source of drinking water associated with the  $i^{th}$  child (piped water = 1, otherwise = 0);

$X_{7i} =$  consumption of "yam, sweet potato, or dasheen" associated with the  $i^{th}$  child (No consumption = 0; otherwise = 1);

$X_{8i} =$  consumption of "carrot or pumpkin" associated with the  $i^{th}$  child (No consumption = 0; otherwise = 1);

$X_{9i} =$  consumption of "callaloo, broccoli, or pak choi" associated with the  $i^{th}$  child (No consumption = 0; otherwise = 1);

$X_{10i} =$  consumption of "cabbage" associated with the  $i^{th}$  child (No consumption = 0; otherwise = 1);

$X_{11i} =$  consumption of "avocado" associated with the  $i^{th}$  child (No consumption = 0; otherwise = 1);

$X_{12i} =$  frequency of seafood consumption associated with the  $i^{th}$  child = number of seafood meals consumed in a week;

$X_{13ij} = \begin{cases} 1, & \text{if the } i^{th} \text{ child in the } j^{th} \text{ matched pair is an ASD case} \\ 0, & \text{if the } i^{th} \text{ child in the } j^{th} \text{ matched pair is a control} \end{cases}$ ;

$E(Y_{1i} | X_{1i}, X_{13ij})$  stands for mean ln of blood arsenic concentrations given  $X_{1i}, X_{13ij}$ ;  
 $E(Y_{2i} | X_{1i}, X_{2i}, \dots, X_{13ij})$  stands for mean ln of blood arsenic concentrations given the  $X_{1i}, X_{2i}, \dots, X_{12i}, X_{13ij}$ ;  
 $\beta_{10}, \beta_{11}, \beta_{12}, \beta_{113j}$  are regression coefficients associated with the univaribale model;  
 $\beta_{20}, \beta_{21}, \dots, \beta_{212}, \beta_{213j}$  are regression coefficients associated with the final multivaribale model.

© 2014 by the authors; licensee MDPI, Basel, Switzerland. This article is an open access article distributed under the terms and conditions of the Creative Commons Attribution license (<http://creativecommons.org/licenses/by/3.0/>).
